# Supplementary material
Source: MDPI journal article supplement (https://www.mdpi.com/search?q=viruses-07-01258)
Supplement: s001 [file viruses-07-01258-s001.pdf]

Suppl. Figure 2. Nucleotide sequence alignment of envelope genes of KoRV-F and env-like region of defective KoRV-F (Def-KF). Identical sequences are denoted with \* below the alignment. Nucleotides that differ are highlighted in green.

|        |                                                                                                                                           |                                               |                                                                                        |     |
|--------|-------------------------------------------------------------------------------------------------------------------------------------------|-----------------------------------------------|----------------------------------------------------------------------------------------|-----|
| KoRV-F | A                                                                                                                                         | TGCTTTCATCTCAAACCCGCGCCACCTGGGGCACCCGATGAGTCC | TGGAACTGAAAAGACTGATCATCTCTTAAAGTTGCGTGTTCGGCGCGCCGAAATGAATCAACAGCATAAAAGACTGATCATCTCTT | 138 |
| Def-KF | A                                                                                                                                         | TGCTTTCATCTCAAACCCGCGCCACCTGGGGCACCCGATGAGTCC | TGGAACTGAAAAGACTGATCATCTCTTAAAGTTGCGTGTTCGGCGCGCCGAAATGAATCAACAGCATAAAAGACTGATCATCTCTT | 139 |
|        | *                                                                                                                                         | *****                                         |                                                                                        |     |
| KoRV-F | AGTTGCGTGTTCGGCGCGCCGAAATGAATCAACAGCATAACAACCTCACCAACCCATGACTCTCACCTGGCAGGTACTGTCCAGACGGGAAGTGTGTTTGGGAAAAGAAAGCAGTCGAGCCACCTGGACGTGGT    | 277                                           |                                                                                        |     |
| Def-KF | AGTTGCGTGTTCGGCGCGCCGAAATGAATCAACAGCATAACAACCTCACCAACCCATGACTCTCACCTGGCAGGTACTGTCCAGACGGGAAGTGTGTTTGGGAAAAGAAAGCAGTCGAGCCACCTGGACGTGGT    | 278                                           |                                                                                        |     |
|        | *                                                                                                                                         | *****                                         |                                                                                        |     |
| KoRV-F | GGCCCTCTCTTGAGCCTGATGTGTGCGCACTGGTAGCCGGTCTCGAGTCTGGGACATCCCGAACTACTGCATCGGCCTCTCAACAGGCCAGGCCACCTCTGTTTGACCGGCCTTGGGGAATCCCGGGGCTGGCTT   | 416                                           |                                                                                        |     |
| Def-KF | GGCCCTCTCTTGAGCCTGATGTGTGCGCACTGGTAGCCGGTCTCGAGTCTGGGACATCCCGAACTACTGCATCGGCCTCTCAACAGGCCAGGCCACCTCTGTTTGACCGGCCTTGGGGAATCCCGGGGCTGGCTT   | 417                                           |                                                                                        |     |
|        | *                                                                                                                                         | *****                                         |                                                                                        |     |
| KoRV-F | TGCAGCCTCCGGATGGGGGGAACCCTAGGGTGTAGCTATCCCGGGCCAGAACAAGAATTGCTATGTCCCGTTTTACGTGTGCCCGGGATGGCCGTTCCCTGTCCGAGGCCGGAGGTGCGGAGGACTCGAATCT     | 555                                           |                                                                                        |     |
| Def-KF | TGCAGCCTCCGGATGGGGGGAACCCTAGGGTGTAGCTATCCCGGGCCAGAACAAGAATTGCTATGTCCCGTTTTACGTGTGCCCGGGATGGCCGTTCCCTGTCCGAGGCCGGAGGTGCGGAGGACTCGAATCT     | 556                                           |                                                                                        |     |
|        | *                                                                                                                                         | *****                                         |                                                                                        |     |
| KoRV-F | TTTACTGTAGAGGGTGGGGTGTGAGACCGGGGAACCACTTACTGGCAACCCGGTCTCGTGGGACCTTATAACTGTAGGCCGGGGCCACCTACGGGGACATGCGAACACACCGGTTGGTGAACCCACTCAAGA      | 694                                           |                                                                                        |     |
| Def-KF | TTTACTGTAGAGGGTGGGGTGTGAGACCGGGGAACCACTTACTGGCAACCCGGTCTCGTGGGACCTTATAACTGTAGGCCGGGGCCACCTACGGGGACATGCGAACACACCGGTTGGTGAACCCACTCAAGA      | 695                                           |                                                                                        |     |
|        | *                                                                                                                                         | *****                                         |                                                                                        |     |
| KoRV-F | TAGAGTTCACCGAGCCTGGCAAACGGTTCGAAACTGGTACAGGGGCGAACCTGGGGTCTAAGGTTCTATGTGACTGGACACCCAGGCGTGCAGTTGACCATACGACTAGTGTATCACAAGTCCCCACCGGTAGTAGT | 833                                           |                                                                                        |     |
| Def-KF | TAGAGTTCACCGAGCCTGGCAAACGGTTCGAAACTGGTACAGGGGCGAACCTGGGGTCTAAGGTTCTATGTGACTGGACACCCAGGCGTGCAGTTGACCATACGACTAGTGTATCACAAGTCCCCACCGGTAGTAGT | 834                                           |                                                                                        |     |
|        | *                                                                                                                                         | *****                                         |                                                                                        |     |
| KoRV-F | GGGCCCCGATCTGTCTCGCAGGACAAGGACCTCCAGAAAAATTCCCTTCCCTCCCCAGAGTGCCGGTTCCCTACCCATACACCCAGCGTCCCTATCCCCACGGTACAGGCTAGCCCCGGCCCTAGTACTCCA      | 837                                           |                                                                                        |     |
| Def-KF | GGGCCCCGATCTGTCTCGCAGGACAAGGACCTCCAGAAAAATTCCCTTCCCTCCCCAGAGTGCCGGTTCCCTACCCATACACCCAGCGTCCCTATCCCCACGGTACAGGCTAGCCCCGGCCCTAGTACTCCA      | 838                                           |                                                                                        |     |
|        | *                                                                                                                                         | *****                                         |                                                                                        |     |
| KoRV-F | TCTCCACACGGGCGACCGGCTCTTTGGCCTCGTACAAGGGGCTTTCTGGCCTTGAATGCCACCAACCCGGAGGCCACGGAGTCTTGTGGTCTGTCTAGCCCTCGGCCCTCCTTATTACGAAGGAATCGCAACTC    | 972                                           |                                                                                        |     |
| Def-KF | TCTCCACACGGGCGACCGGCTCTTTGGCCTCGTACAAGGGGCTTTCTGGCCTTGAATGCCACCAACCCGGAGGCCACGGAGTCTTGTGGTCTGTCTAGCCCTCGGCCCTCCTTATTACGAAGGAATCGCAACTC    | 973                                           |                                                                                        |     |
|        | *                                                                                                                                         | *****                                         |                                                                                        |     |
| KoRV-F | CAGGGCAAGTCACTTATGCCTCCACAGATTCCTAATGTCTCTGGGAGGAAAAGGGAAGCTCACCTCACTGAAGTCTCTGGACTCGGGTTATGTATAGGGAAGTACTCTTACTACCAACATCTCTGCAACCTGAC    | 1111                                          |                                                                                        |     |
| Def-KF | CAGGGCAAGTCACTTATGCCTCCACAGATTCCTAATGTCTCTGGGAGGAAAAGGGAAGCTCACCTCACTGAAGTCTCTGGACTCGGGTTATGTATAGGGAAGTACTCTTACTACCAACATCTCTGCAACCTGAC    | 1112                                          |                                                                                        |     |
|        | *                                                                                                                                         | *****                                         |                                                                                        |     |
| KoRV-F | TATACCTTAAACGCCTACATACTACAAGTACCTCCCTCCCAACACAGCTGGTGGGCTGTGAATTCGGCCTCACCCCTGCCTCTTACATCAGTCTTCAACCAGTCTAACGATTTCTGTATCCAGATCCAG         | 1197                                          |                                                                                        |     |
| Def-KF | TATACCTTAAACGCCTACATACTACAAGTACCTCCCTCCCAACACAGCTGGTGGGCTGTGAATTCGGCCTCACCCCTGCCTCTTACATCAGTCTTCAACCAGTCTAACGATTTCTGTATCCAGATCCAG         | 1198                                          |                                                                                        |     |
|        | *                                                                                                                                         | *****                                         |                                                                                        |     |
| KoRV-F | CTTGTCCCTCGCATCTACTATACCCAGACGGTACCTTGTCTACAGGCCATGAGTCCCCACCCTAGAAAACAAGAGAGAGCCTGTCTCACTCACCTGGCTGTCTTCTCGGATTAGGGGTCGCAGCAGGTATAGGTA   | 1250                                          |                                                                                        |     |
| Def-KF | CTTGTCCCTCGCATCTACTATACCCAGACGGTACCTTGTCTACAGGCCATGAGTCCCCACCCTAGAAAACAAGAGAGAGCCTGTCTCACTCACCTGGCTGTCTTCTCGGATTAGGGGTCGCAGCAGGTATAGGTA   | 1251                                          |                                                                                        |     |
|        | *                                                                                                                                         | *****                                         |                                                                                        |     |
| KoRV-F | CCGGCTCGACCGCCCTAATAAAAGGGCCATCAAGACCTCCAACAAGGTTTGACTAGCCTCCAATTGCCATGGATACAGACCTTAGAGCCCTTCAAGACTCCGTAAGTCAACTAGAGAATTCCTTAACCTCCCTTCT  | 1389                                          |                                                                                        |     |
| Def-KF | CCGGCTCGACCGCCCTAATAAAAGGGCCATCAAGACCTCCAACAAGGTTTGACTAGCCTCCAATTGCCATGGATACAGACCTTAGAGCCCTTCAAGACTCCGTAAGTCAACTAGAGAATTCCTTAACCTCCCTTCT  | 1390                                          |                                                                                        |     |
|        | *                                                                                                                                         | *****                                         |                                                                                        |     |
| KoRV-F | GAAGTAGTGTCTGAATAGGAGAGGCCCTTGTCTGCTATTTTTGAAGGAAGGGGCTTTGTGTCAGCCCTAAAAGAGGAGTGTCTGTTTCTATGTTGACCCTCAGGCCCGGTGCGAGACTCCATGAGGAACTCAAGGAA | 1528                                          |                                                                                        |     |
| Def-KF | GAAGTAGTGTCTGAATAGGAGAGGCCCTTGTCTGCTATTTTTGAAGGAAGGGGCTTTGTGTCAGCCCTAAAAGAGGAGTGTCTGTTTCTATGTTGACCCTCAGGCCCGGTGCGAGACTCCATGAGGAACTCAAGGAA | 1529                                          |                                                                                        |     |
|        | *                                                                                                                                         | *****                                         |                                                                                        |     |
| KoRV-F | AGGCTAGATAAAGAGCAGTTAGAGCACAAAAGAATTTAAGTTGGTACGAGGGATGGTTCAACCGTTCCCCCTGGCTTACTACTTTACTGTCTGCCCTTGTGTTCCCTTGCTACTCCTCTTCTGTTACTCACCTCG   | 1667                                          |                                                                                        |     |
| Def-KF | AGGCTAGATAAAGAGCAGTTAGAGCACAAAAGAATTTAAGTTGGTACGAGGGATGGTTCAACCGTTCCCCCTGGCTTACTACTTTACTGTCTGCCCTTGTGTTCCCTTGCTACTCCTCTTCTGTTACTCACCTCG   | 1668                                          |                                                                                        |     |
|        | *                                                                                                                                         | *****                                         |                                                                                        |     |
| KoRV-F | GGCCTTGTGTCTCATCAATAAGTTAGTGCAATTCGTCAATGATAGGGTTAGTGCAGTAAGAATCCTGTTCCTCAGACACAAGTACCAGACCTTAGACAACGAGGATAACCTTTAA                       | 1780                                          |                                                                                        |     |
| Def-KF | GGCCTTGTGTCTCATCAATAAGTTAGTGCAATTCGTCAATGATAGGGTTAGTGCAGTAAGAATCCTGTTCCTCAGACACAAGTACCAGACCTTAGACAACGAGGATAACCTTTAA                       | 1780                                          |                                                                                        |     |
|        | *                                                                                                                                         | *****                                         |                                                                                        |     |



Suppl. Figure 1. Alignment of KoRV-B with defective KoRV-B (Def-B) sequences. Def-B sequences were obtained from two overlapping PCR amplicons obtained with primer pairs P8/P3 and P2/P7. The sequences of these primers are underlined in the text. Identical nucleotides are denoted with a short bar between the nucleotide sequences. Dashes indicate gaps between sequences. Square brackets are used to indicate major sections of the KoRV-B genome including 5' LTR, gag, pro-pol, env [14]. Env sequences are also colored blue for KoRV-B, and nucleotides that differ between the regions of KoRV-B env and Def-B env-like sequences are highlighted in green.



|        |                                                                                                                         |      |
|--------|-------------------------------------------------------------------------------------------------------------------------|------|
| KoRV-B | -----TCCC--ACGGCAAGGGATAATCTCTTCTGATCTCACAGTTGCACGTCTTGTGAGAGACATACCCTAC                                                | 901  |
| Def-B  | AATATACTTTTATCTTTAGATGACACCATTGAAGAACTGGTATTATGAAGAACATAAAAT-GCACT--GTTTTTATTTTATTTTCCACTGTCTTAAAGTGAAGGTGTAGGTTAAAT    | 1190 |
| KoRV-B | CTTCTGACTCTTTTTCTGTCTTTTAAATATACGCTACGCCGCATATAATTTTTTTCCTTTTTATTTCAATAATAATCATTATCTGGGTGCGTAATCCACTCTTCGGGACCCCAGAA    | 1021 |
| Def-B  | ACAAAATACAAATTGATAGGTTGGCCACATAACAAGGAAAATGTGAATGTTTAAATTTGGCTTAAAGATTTCCATGTGCAGTGTACATTTGTGACAAGCTTCTAATTCACAGAACCCTC | 1310 |
| KoRV-B | TGGGACAGGGTGAGTCGACCCCTCTCTCTTACTAGACCCTGGAAAGACGTGAAGACAAGGGCTCACAACTTTCCGTGGAGATAAGAAAGGAAAGTGGCAAACCTTCTGTTCCCT      | 1141 |
| Def-B  | AGGTTTAAATCGATCTCTCTCTCTTTATCCACACTGGTTTCACTGAAACGTCGTGAGGTCAAGGGCTCACAACTTTTCAGTGGAGACGCAAAGGAAAATGGCAAACCCCTCTGTTCCCT | 1430 |
| KoRV-B | CCGAGTGGCCACGTTTGAAGTGGGATGGCCACCGAGGGGAC-TTTTAATCCTTCTATATTTCTGCA-GT-CAAAGGATTGTCTTCCAGGAGACTGGAGGACACCCGGACCAGGTTTC   | 1258 |
| Def-B  | CCGAGTGGCCACGTTTGAAGTGGGATGTCCACAGGAGGGAAATTTTAAATCCTTCTATATTTCTACAGTCAAAGCGGTTGTCTTCCGGAGACTGGAAGACACCCGGACTAGATTTCCCT | 1550 |
| KoRV-B | CCTACATCATAGTTTGGCAGGACCTCTCCAACAGCCCCCCCCATGGGTGCCACCCTTAGCCAAGATCGCCGTTGCCTCTGGTCAAGATAACGGGCGAAAGTCCGGCGGGGGAGGCCGT  | 1378 |
| Def-B  | ACACCGTGATGTGACAGGACCCCCCTTAATCAACCTCAGTGGGATCACAACTTGGCTGAAGGTAAGGAACGTCGCCTAGTCT--ACCA-----                           | 1637 |
| KoRV-B | CCGCTCCTTCCCGGCTCCCATCTACCCGAGACGGACAGCCTGTTCCTCCTCTCAGAACCCCGCCCTATCCAACATCCCTCCACCTCCCCAGCCCCTCACGCGCCAGACCAGCGC      | 1498 |
| Def-B  | -----                                                                                                                   | 1637 |
| KoRV-B | CAGGCCTAATGGCTGAGGGACTCGGCTCTGAGGGACCGCCGCTGGAAC TAGGAGTCGCCGTCGCCGAGTCTACGGGTGACACTGGTCTGACTCCACTGTGGCCCTGCCCTCCGGG    | 1618 |
| Def-B  | -----                                                                                                                   | 1637 |
| KoRV-B | CCGTGGGACCCCGCCGAACCAACGGCTTAGTCCCCTTGCAATATTGGCCTTTCTCCTCAGCAGATCTCTATAATTGGAAATCTAATCATCCTTCTTTTCCGAGAATCTACAGGAC     | 1738 |
| Def-B  | -----                                                                                                                   | 1637 |
| KoRV-B | TCACGGGACTCCTTGTAGTCCCTCATGTTTTCCACCAGCCTACTTGGGACGATTGCCAGCAGCTCCTGCAAGTCTCTTTACCACCGAGGAAAGAGAAAGGATTCTTTTGGAGGCTCGCA | 1858 |
| Def-B  | -----                                                                                                                   | 1637 |

gag

KoRV-B AGAACGTCTTGGAGTTAACGGGGCCCCACACAACCTCGAGAACCTCATTAATGAGGCCCTTCCCCCTTAATCGACCTCAATGGGATCACAAACACGGCTGAAGGTAGGGAGCGTCTCTGG 1978  
 Def-B ----- 1637

KoRV-B TCTACCGCCGACTCTAGTGGCGGGTCTCAAAGGGGCAGCAAGGCGCCACCAATTTGGCCAAGGTAAGAGAAGTCTTGCAGGGACCAACAGAACCCCGTCCGTTTTTCTAGAACGTC 2098  
 Def-B -----CCGGACTCTAGTGGCGGGTCTCAAAGGGGCAAAAAGGCGCCACCAATTTGGCCAAGGTAGGAGAGATCTTGTAGAGACCAACGGGATCCCGTCCGTTTTTCTTGAACGTC 1750

KoRV-B TAATGGAGGCTTATAGGAGATATACCCCATTTGATCCCTCTTCTGAGGGACAAAAGCGCGGTGGCCATGTCCTTTATCGGACAGTCTGCCCGGATATTA AAAAGAAATTACAAGAC 2218  
 Def-B TAACGG-----AGGAGATATACCCCAT-----AT-GATACAAAATGGCGCTGGTGGCCTTGTCCTTTATCGGACAGTC----- 1817

KoRV-B TGGAAGGACTCCAGGACCATTCCTTGCAGGATCTCATAAAGGAGGCAGAGAAGGTATATCATAAGAGAGAGACAGAGGAAGAAAAGCAAGAAAGAGAGAAAAGGAGACAGAGGAAAGAG 2338  
 Def-B ----- 1817

KoRV-B AGAGACGGCGTGACAGGCGCCAGGAGAAAACTTGACCAAAAT--CTTGGCCGCGGTAGTAAGTGAGAAAAGGGTCCAGAGGGAGACAGGCAGGGAATCTGAGCAACAGGGCAATGAGGGC 2456  
 Def-B -----CGCCCTGATATTACT-AAGAAATCACAGAGACTGGGGGACTCCAGGACCAGGGAGGCAGGTAGGGACCTGAGCAACA 1895

KoRV-B ACCTAGGGAAGGAAGACCGCCTCTGGACAAAGATCAGTGCGCATACTGTAAAGAAAGGGCCATTTGGGCAAGGGAGTGCCCGGAAGAAGAACGCCAGGGAACCAATGTCTGACCCCT 2576  
 Def-B AGGCAATGAGCACCTAAGGAAGAAAGGTCGCCTCTGCACGAAGACCAGTGTGCATATGGAAGC TGAGCAAGAGAGTGTCCCTGGAAGAAGTACGGCAGGAAAGCCAGAGTCTGACCTT 2015  
 Primer P2

gag  
 KoRV-B GGGTGACTACGGGAGTCGGGGTTCGGACCCCTCCCCGAGCCAGGGTAACTGTTAACTGTGGAGGGGATCCCCACTGAGTTTTTGGTTGATACCGGGCCGAACATTCAGTATTGACCAA 2696  
 Def-B GGGCGACTAAGGAAAGTTGCCTAGTAACAGGACACTGACGGGCATATTTTGGGTGAATTGAAGTTTACCCTACAGAAATAAAGACAGCCTGACCCTCAGCAAGAAGATGTTGAGGGAA 2135

Pro-  
 KoRV-B GCCTATGGGAAAGATGGGACCCAAACGGACAGTCTGCTGGCTGGGGCGACGGGCAGCAAAGTTTACCCTTGAGACCACCAAGAGACTTTTGGAAATTTGGACAAAAGCAAGTGACCCACTCATT 2816  
 Def-B TCTTACCTCGCTTT----- 2149

KoRV-B CTTGGTCATACCCGAATGCCTGCTCCCTGTATTAGGCAGGGACCTCCTCACCAAGCTAAAAGCTCAAATCCAGTTTTCCACAGAGGGCCACGGGTAACATGGGAAGACCGCCCGCCAT 2936  
 Def-B ----- 2149

KoRV-B GTGTTTAGTCCTGAACTTGAGAGAGGAATACCGATTACACGAAAAGCCGgTCCCTCCTTCTATCGACCCGTCATGGCTCCAACCTTTCCCATGGTTTGGGCCGAGAAGGCAGGTATGGG 3056  
 Def-B ----- 2149

|        |                                                                                                                          |      |
|--------|--------------------------------------------------------------------------------------------------------------------------|------|
| KoRV-B | ACTGGCCAATCAAGTCCCACCAGTGGTAGTGGAAGTGAAGTCAGATGCCTCACCAGTGGCTGTTGACAGTACCCAATGAGCAAGGAAGCCCGGAGGGTATCAGGCCCCACATCCAAAG   | 3176 |
| Def-B  | -----                                                                                                                    | 2149 |
| KoRV-B | ATTCTTGGATTTGGGGATTCTGGTACCTTGCCAGTCGCCCTGGAACACCCCTTTGTTACCTGTAAAAAGCCTGGAACCAATGACTATCGGCCAGTCCAAGATTTGAGGGAGGTCAACAA  | 3296 |
| Def-B  | -----                                                                                                                    | 2149 |
| KoRV-B | AAGAGTACAGGACATTCATCCCACAGTCCCGAACCCCTATAACCTACTCAGTTCCCTCCCGCCAGCCACACCTGGTATTCAGTTTTAGACCTCAAAGATGCTTTCTTTTGCCTCAAGCC  | 3416 |
| Def-B  | -----                                                                                                                    | 2149 |
| KoRV-B | ACACCCCAACAGCCAGCCATTGTTTCGCGTTTGAATGGAGAGATCCAGAAAAAGGCAATACTGGCCAGCTAACCTGGACTCGGCTACCGCAAGGATTCAAGAACTCTCCACCCCTCTCGA | 3536 |
| Def-B  | -----                                                                                                                    | 2149 |
| KoRV-B | TGAGGCCCTCCACCGGGATCTGGCATCCTTCAGGGCTCTCAACCCCAAGGTAGTGATGCTCCAATATGTTGATGACCTCCTGGTAGCGGCCCAACGTACCGAGACTGCAAAGAAGGGAC  | 3656 |
| Def-B  | -----                                                                                                                    | 2149 |
| KoRV-B | ACGAAGGCTCTTACAGGAACTAAGTAAGTTGGGATACCGAGTGTGCGCCAAAAAGGCCAGCTTTGCCGGGAGGAAGTTACGTATCTCGGGTATTTGCTAAAAGGGGGGAAGAGATGGCT  | 3776 |
| Def-B  | -----                                                                                                                    | 2149 |
| KoRV-B | GACCCAGCCCGAAGGCCACTGTAATGAAGATCCCCACCCCTACAACCCCAAGTCCGTGAGTTTTTGGGCACGCTGGATTCTGTAGGCTCTGGATCCCTGGTTTCGCTTCCCT         | 3896 |
| Def-B  | -----                                                                                                                    | 2149 |
| KoRV-B | GGCTGCACCCCTGTACCCCTGACGAGAGAAAAGGTTCCCTTTACCTGGACTGAGGCCACCAGGAAGCCTTTGGCCGTATAAAAGAGGCCCTGCTATCGGCCCCCGCCCTGGCCCTTCC   | 4016 |
| Def-B  | -----                                                                                                                    | 2149 |
| KoRV-B | GGACCTCACCAAGCATTGCTCTGTACGTGGATGAAAAAGAGGGTGTTCGCCGGGGGTGCTTACTCAAACCCTAGGACCATGGCGACGCCCGGTAGCTTACCTGTCAAAAAATTAGA     | 4136 |
| Def-B  | -----                                                                                                                    | 2149 |
| KoRV-B | TCCGGTGGCCAGTGGGTGGCCAACCTGCCTAAAAGCAATTGCGGCCGTAGCACTCCTTCTCAAGGACGCTGATAAGTTAACCCTAGGACAGAACGTGTTGGTGATGCACCTCACAACCT  | 4256 |
| Def-B  | -----                                                                                                                    | 2149 |

|        |                                                                                                                           |      |
|--------|---------------------------------------------------------------------------------------------------------------------------|------|
| KoRV-B | GGAAAAGTATTGTGAGACAGCCCCCGACCGATGGATGACAAATGCCAGGATGACCCATTACCAAAGTCTGCTGCTGAATGAGAGGGTGTCTTTTGCGCCCCCGCCATTCTGAATCCTGC   | 4376 |
| Def-B  | -----                                                                                                                     | 2149 |
| KoRV-B | CACCCCTGCTCCCCGTAGAGTCAGACGACACCCCAATACACATATGCTCAGAAATCCTTGCCGAGGAGACAGGAACCCGACCTGATCTGAGAGATCAGCCGTTGCCCGGGTACCCGCTTG  | 4496 |
| Def-B  | -----                                                                                                                     | 2149 |
| KoRV-B | GTATACGGATGGCAGCAGTTTCATCATGGATGGCAGGCGACAAGCAGGTGCTGCCATTGTGGACAACACGCGGACGGTGC GGCGAGCAACCTGCCAGAGGGAACGTCAGCTCAGAAGGC  | 4616 |
| Def-B  | -----                                                                                                                     | 2149 |
| KoRV-B | CGAACTAATCGCCTTGACACAAGCATTACGCTTGCCGAAGGAAAAAGCATCAACATCTACACGGACAGCAGGTACGCTTTTGCCACCGCTCATGTTACGGGGCTATATACAAACAAAG    | 4736 |
| Def-B  | -----                                                                                                                     | 2149 |
| KoRV-B | AGGACTGCTCACTTCCGCTGGAAAAGACATCAAGAACAAGAGGAGATTTTGGCCCTGCTAGAGGCCATCCATCTCCCTAAGCGAGTCGCTATCATCCATTGCCCCGGCCACCAAAGAGG   | 4856 |
| Def-B  | -----                                                                                                                     | 2149 |
| KoRV-B | GACTGACCCGTGGCTACCGGAAACCGAAAGGCCGATGAGGCCGGAACAAGCTGCCAGTCAACCAGAATACTGACGGAGACCACGAAAAATCAAGAACACTTCGAGCCTACACGGGG      | 4976 |
| Def-B  | -----                                                                                                                     | 2149 |
| KoRV-B | GACGATCAAGCCGAAAGAGCTCACCCCTGACCAGGGAAGGAATTCATTCAACGGCTGCATCAGCTCACGCACCTAGGGCCAGACAAGCTTCTCCAGCTTGTAGGTCGCACCAGTCTTCA   | 5096 |
| Def-B  | -----                                                                                                                     | 2149 |
| KoRV-B | CATCCCGAATCTCCAGTCTGTAGTGCCTGAAATCACCAGCAAGTGTGAGGTTTGTGCTGTAACCTAACGCAGTCACCACCTACCGAGAGTCTGGAAGGAGGCAAAGGGGAGATCGACCCGG | 5216 |
| Def-B  | -----                                                                                                                     | 2149 |
| KoRV-B | CGTGATTGGGAAGTAGACTTCACAGAGGTTAAGCCTGGCCGGTATGGTAATAGATATTTGCTAGTGTATTATCGATACATTTTCTGGGTGGGTAGAAGCTTTCCTACAAAAACAGAGAC   | 5336 |
| Def-B  | -----                                                                                                                     | 2149 |
| KoRV-B | AACCCTGACCGTCTGCAAGAAGATACTTGAGGAAATCCTACCTCGTTTCGGGATCCCTAAGGTACTCGGGTCCGACAATGGCCCTGCCTTCGTTGCTCAGGTAAGCCAGGGGCTGGCCAC  | 5456 |
| Def-B  | -----GGGATCCCTAAGGTACTCGGGTCCGACCATGACCTACCTTCGTTGCTCAGGTAAGCCAGGGGTTGGCCAC                                               | 2220 |



|        |                                                                                                                          |      |
|--------|--------------------------------------------------------------------------------------------------------------------------|------|
| KoRV-B | TCAACTGGGGATTAATTGGAAATTACATTTGTCATATAGACCCAGAGCTCAGGTCAGGTAGAAAAGGATGAATAGGACAATAAGAGACCTTGACAAAATTGGCCTTAGAGACCGGTGG   | 5576 |
| Def-B  | TCAACTGGGGATTTGATTGGAAATTACATTTGTCATATAGACCCAGAGCTCAGGTCAGGTAGAAAAGGAAGAATAGGACAATAAGAGGCCCTTGACAAAATTGGCCTTAGAGACAGGCGG | 2340 |
| KoRV-B | AAAAGACTGGGTGACCCCTCCTCCCTTGGCGCTACTTAGGGCCCGGAGTACCCCTGGCCAGTTTGGCCTGACTCCTTATGAGATTCTTCATGGGGGGCCGCCCTGTACTTGGCTCTGG   | 5696 |
| Def-B  | AAAAGACTGGGTGACCCCTCCTCCC-TTT-GGCG-CTGCTTAGGGCCTGGAATACCCTGACTCTTCATGAGATTCTTCAAGAAGG-----GGGGGGCCGCCCTGTACTTGTGTCTGG    | 2450 |
| KoRV-B | AGAAGTCGTGGGTTCTAATGGTGATTTTTTCCCGTTCTATTTACCCACTTGAAGGCTTTAGAGGTTGTGAGGACTCAGATCTGGGACCAGATAAAAAGAAGCCTACAGGCCTGGTACTGT | 5816 |
| Def-B  | GGAAGTCGTGGGTTCTAATGATGATTTTTTCCCGTTCTATTACCCACATGAAAGCTTTAGAGGTTGTGAGGACTC-----GACCAGATAAAAAGAAGCCTCCAGGCCTGGTACTGT     | 2562 |
| KoRV-B | GGCCATTCCCACCCGTTCCAGGTCGGTGACCGAGTGCTGGTTAGACGTATCGGTCCGGCAGCCTTGAGCCTCGGTGGAAAGGCCATACCTGGTGCTACTGACCACCCGACCGCGGT     | 5936 |
| Def-B  | GACCATTCCCACCCGTTCCAGGTCGGTGACCAAGTGCTGGTTAGACGCCATCGGTCCGGCAGCCTTGAGCCTCGGTGGAAAGGCTCATACTGGTGCAA-----                  | 2663 |
| KoRV-B | GAAGGTTGACGGTATTGCTGCCTGGGTCCTGCTTCTCATCTCAAACCCGCGCCACCTGGGGCACCAGATGAGTCTGGGAACGGAAAGACTGATCATCTCTTAAGTTGGTGTTCG       | 6056 |
| Def-B  | -----CCTGCTTCTCATCTCAAACCCGCGCCACCTGGGGCACCAGATGAGTCTGGGAACGGAAAGACTGATCATCTCTTAAGTTGGTGTTCG                             | 2753 |
| KoRV-B | CGGCGCCGAAATGATCAACAGCATAAACCCTCACCAACCCATGACTCTCACCTGGCAGGTAAGTGTCCAGACGGGAAGCTCGTTTGGGAAAAGAAAGCAGTCGAGCCACCTGGA       | 6176 |
| Def-B  | CGGCGCCGAAATGATCAACAGCATAAACCCTCACCAACCCATGACTCTCACCTGGCAGGTAAGTGTCCAGACGGGAAGCTCGTTTGGGAAAAGAAAGCAGTCGAGCCACCTGGA       | 2870 |
| KoRV-B | CGTGGTGGCCCTCCTTGAGCCTGATGTGTGTGCGCTGGCGGCGGGTCTTGAGACCTGGGGCATCCCGCACCTCACCGGCCAGAATCTCAACAGTCTGCGCCCCCGATGGCTGTGGGG    | 6296 |
| Def-B  | CGTGGTGGCCCTCCTTGAGCCTGATGTGTGTGCGCTGGCGGCGGGTCTTGAGACCTGGGGCATCCCGCACCTCACCGGCCAGAATCTCAACAGTCTGCGCCCCCGATGGCTGTGGGG    | 2990 |
| KoRV-B | TGCTTTATAGTCAGGTCGGCAGGGGTTGGTCAGGCAATCGAGCTATGGAACCTTGGGGTGTGCTGTCCCCGAGACCGGAACAGACTGGCTCAATCTCAGTTCTATGTGTGTCCCCGG    | 6416 |
| Def-B  | TGCTTTATAGTCAGGTCGGCAGGGGTTGGTCAGGCAATCGAGCTATGGAACCTTGGGGTGTGCTGTCCCCGAGACCGGAACAGACTGGCTCAATCTCAGTTCTATGTGTGTCCCCGG    | 3110 |
|        | Primer P3 complementary                                                                                                  |      |
| KoRV-B | ATGGCCGTTCCCTGTCCGAGGCCTGGAGGTGCGGAGGGTTTGTAGTCTTTGTAATGTAAAGAGTGGGGTTGTGAGACCACGGGAACCGCCTACTGGCAACCCCGTCTCGTGGGACCTTA  | 6536 |
| Def-B  | ATGGCCGTTCCCTGTCCGAGGCCTGGAGGTGCGGAGGGTTTGTAGTCTTTGTAATGTAAAGAGTGGGGTTGTGAGACCACGGGAACCGCCTACTGGCAACCCCGTCTCGTGGGACCTTA  | 3230 |
| KoRV-B | TAACTGTAGGCCGGGCCACCCCTACGGGGACATGCGAACACACCGGTTGGTGCAACCCACTCAAGATAGAGTTACCGAGCCTGGCAAACGGTCCGAAACTGGCTACAGGGGCGAACCT   | 6656 |
| Def-B  | TAACTGTAGGCCGGGCCACCCCTACGGGGACATGCGAACACACCGGTTGGTGCAACCCACTCAAGATAGAGTTACCGAGCCTGGCAAACGGTCCGAAACTGGCTACAGGGGCGAACCT   | 3350 |

|        |                                                                                                                         |      |
|--------|-------------------------------------------------------------------------------------------------------------------------|------|
| KoRV-B | GGGGTCTAAGGTTCTATGTGACTGGACACCCAGGCGTGCAGTTGACCATACGACTAGTGTATCACAAGTCCCCACCGGTAGTAGTGGGCCCGATCCTGTCTCGCAGACAAGGACCTC   | 6776 |
| Def-B  | GGGGTCTAAGGTTCTATGTGACTGGACACCCAGGCGTGCAGTTGACCATACGACTAGTGTATCACAAGTCCCCACCGGTAGTAGTGGGCCCGATCCTGTCTCGCAGACAAGGACCTC   | 3470 |
| KoRV-B | CCAGAAAAATTCCTTCCTCCCCAGAGTGCCGGTTCTACCCATACACCCACAGCGTCCCTATCCCCACGGTACAGGCTAGCCCCCGGCCCTAGTACTCCATCTCCCACCACGGGGC     | 6896 |
| Def-B  | CCAGAAAAATTCCTTCCTCCCCAGAGTGCCGGTTCTACCCATACACCCACAGCGTCCCTATCCCCACGGTACAGGCTAGCCCCCGGCCCTAGTACTCCATCTCCCACCACGGGGC     | 3590 |
| KoRV-B | ACCGGCTCTTGGCCTCGTACAAGGGGCTTTCTGGCCTTGAATGCCACCAACCCGAGGCCACGGAGTCTTGCTGGCTCTGTCTAGCCCTCGGCCCTCCTTATTACGAAGGAATCGCAA   | 7016 |
| Def-B  | ACCGGCTCTTGGCCTCGTACAAGGGGCTTTCTGGCCTTGAATGCCACCAACCCGAGGCCACGGAGTCTTGCTGGCTCTGTCTAGCCCTCGGCCCTCCTTATTACGAAGGAATCGCAA   | 3710 |
| KoRV-B | CTCCAGGGCAAGTCACTTATGCCTCCACAGATTCCCAATGTCGCTGGGGAGGAAAAGGGAAGCTCACCTCACTGAAGTCTCTGGACTCGGGTTATGTATAGGAAAAGTACCTCCTACTC | 7136 |
| Def-B  | CTCCAGGGCAAGTCACTTATGCCTCCACAGATTCCCAATGTCGCTGGGGAGGAAAAGGGAAGCTCACCTCACTGAAGTCTCTGGACTCGGGTTATGTATAGGAAAAGTACCTCCTACTC | 3830 |
| KoRV-B | ACCAACATCTCTGCAACCTGACTATAACCTTAAACGCCTCACATACTCACAAGTACCTCCTCCCTCCAACCACAGCTGGTGGGCTTGTAAATCTGGCCTCACCCCTGCCTCTCTACAT  | 7256 |
| Def-B  | ACCAACATCTCTGCAACCTGACTATAACCTTAAACGCCTCACATACTCACAAGTACCTCCTCCCTCCAACCACAGCTGGTGGGCTTGTAAATCTGGCCTCACCCCTGCCTCTCTACAT  | 3950 |
| KoRV-B | CAGTCTTCAACCAGTCTAACGATTCTGTATCCAGATCCAGCTTGTCCCTCGCATCTACTATCACCCAGACGGTACCTTGCTACAGGCCATAGTACCCCCACCTAGAAAACAGAGAG    | 7376 |
| Def-B  | CAGTCTTCAACCAGTCTAACGATTCTGTATCCAGATCCAGCTTGTCCCTCGCATCTACTATCACCCAGACGGTACCTTGCTACAGGCCATAGTACCCCCACCTAGAAAACAGAGAG    | 4070 |
| KoRV-B | AGCCTGTCTCACTCACCTGGCTGTCTTCTCGGATTAGGGGTCGAGCAGGTATAGGTACCGGCTCGACCGCCCTAATAAAAGGGCCCATGACCTCAACAAGGTTTGACTAGCCTCC     | 7496 |
| Def-B  | AGCCTGTCTCACTCACCTGGCTGTCTTCTCGGATTAGGGGTCGAGCAGGTATAGGTACCGGCTCGACCGCCCTAATAAAAGGGCCCATGACCTCAACAAGGTTTGACTAGCCTCC     | 4190 |
| KoRV-B | AAATTGCCATGGATACAGACTTAGAGCCCTTCAAGACTCCGTAAGTAACTAGAGAATTCCTTAACCTCCCTTCTGAAGTAGTGCTCCAGAATAGGAGAGGCCTTGATCTGCTATTTT   | 7616 |
| Def-B  | AAATTGCCATGGATACAGACTTAGAGCCCTTCAAGACTCCGTAAGTAACTAGAGAATTCCTTAACCTCCCTTCTGAAGTAGTGCTCCAGAATAGGAGAGGCCTTGATCTGCTATTTT   | 4310 |
| KoRV-B | TGAAGGAAGGGGCTTTTGTGCAGCCCTAAAGGAGTGTCTTCTATGTTGACCACCTCAGGCCTGGTGCAGACTCCATGAGGAACACTCAAGGAAAGGTTAGATAAGAGGCAGTTAG     | 7736 |
| Def-B  | TGAAGGAAGGGGCTTTTGTGCAGCCCTAAAGGAGTGTCTTCTATGTTGACCACCTCAGGCCTGGTGCAGACTCCATGAGGAACACTCAAGGAAAGGTTAGATAAGAGGCAGTTAG     | 4430 |
| KoRV-B | AGCACAAAAGAATTAAGTTGGTACGAGGGATGGTTCAACCGTCCCTTGGCTTACTACTTTACTGTCTGCCCTTGCTGGTCCCTGCTACTCCTCCTCTG-TTCTCACCTCGGG        | 7855 |
| Def-B  | AGCACAAAAGAATTAAGTTGGTACGAGGGATGGTTCAACCGTCCCTTGGCTTACTACTTTACTGTCTGCCCTTGCTGGTCCCTGCTACTCCTCCTCTGATTCTCACCTCGGG        | 4549 |

|        |                                  |                                 |                             |                                   |                  |                         |           |      |
|--------|----------------------------------|---------------------------------|-----------------------------|-----------------------------------|------------------|-------------------------|-----------|------|
| KoRV-B | CCTTGTGTCATCAATAAGTTAGTGCAATTC   | TCAATGATAGGGTTAGTGCAGTAAG       | ATTCTG                      | TCTCAG                            | CACAAGTACCAGACCC | TAGACAACGAGGATAACCTTTAA | TTCTGCTCT | 7975 |
| Def-B  | CCTTGTGTCATCAATAAGTTAGTGCAATTC   | TCAATGATAGGGTTAGTGCAGTAAG       | ATCCTG                      | TCTCAG                            | CACAAGTACCAGACCC | TAGACAACGAGGATAACCTTTAA | TTCTGCTCT | 4669 |
| KoRV-B | ATGATTAGAGCTACCTCAAAGAAAATGGGGAA | TGAAGGAGGCAGAAATCATGAGGCAGAAAT  | CATTCCGTGAAGTATGGAAACT      | ACCCGAGGGCCCCAGGGTTAGGGACAAGCGCAG |                  |                         |           | 8095 |
| Def-B  | ATGATTAGAGCTACCTCAAAGAAAATGGGGAA | TGAAGGAGGCAGAAATCATGAGGCAGAAAT  | CATTCCGTGAAGTATGGAAACT      | ACCCGAGGGCCCCAGGGTTAGGGACAAGCGCAG |                  |                         |           | 4789 |
| KoRV-B | CCAGGCACAGTAAAAGGTCAGAGCAAGAAAA  | CAAGGAAGGTTTGGAGTGCCAAACGGAATAT | CTGTGGTCAACGGAATATCTGTGG... |                                   |                  |                         |           | 8215 |
| Def-B  | CCAGGCACAGTAAAAGGTCAGAGCAAGAAAA  | CAAGGAAGGTTTGGAGTGCCAAACGGAATAT | CTGTGGTCAACGGAATATCTGTGG    |                                   |                  |                         |           | 4876 |
|        |                                  |                                 | Primer P7 complementary     |                                   |                  |                         |           |      |

## Supplemental table 1. Host range of KoRV variants.

|              | KoRV-A | KoRV-B | KoRV-C | KoRV-D |
|--------------|--------|--------|--------|--------|
| MDTF-THTR1   | -*     | +**    | -      | -      |
| MDTF-PiT1    | +      | -      | -      | -      |
| XC           | +      | -      | -      | -      |
| BAT          | +      | +      | +      | -      |
| HOS          | +      | +      | +      | -      |
| HT1080       | +      | +      | +      | -      |
| HT1080-KAZAP | -      | +      | +      | -      |
| HT1080-KBZAP | +      | -      | +      | -      |

- Denotes a normalized value of < 0.01
- + denotes a normalized value of 1
